# Supplementary material for: Sensitivity and identifiability of hydraulic and geophysical parameters fromstreaming potential signals in unsaturated porous media
Source: Copernicus journal article supplement (doi:10.5194/hess-2017-730), 2018-01-24
Supplement: Supplementary file [file hess-2017-730-AC1-supplement.pdf]

1 **Sensitivity and identifiability of hydraulic and geophysical parameters from**  
2 **streaming potential signals in unsaturated porous media**

3

4 Anis Younes<sup>1,2,3</sup>, Jabran Zaouali<sup>1</sup>, Francois Lehmann<sup>1</sup>, Marwan Fahs<sup>\*,1</sup>

5 <sup>1</sup>LHyGES, Université de Strasbourg/EOST/ENGEES, CNRS, 1 rue Blessig, 67084 Strasbourg, France.

6 <sup>2</sup>IRD UMR LISAH, F-92761 Montpellier, France

7 <sup>3</sup>LMHE, ENIT, Tunis, Tunisie

8

9 Submitted to: Hydrology-and-Earth-System-Sciences

10 \* Contact person: Marwan Fahs

11 E-mail: [fahs@unistra.fr](mailto:fahs@unistra.fr)

12 ***Abstract***

13 Fluid flow in a charged porous medium generates electric potentials called Streaming  
14 potential (SP). The SP signal is related to both hydraulic and electrical properties of the soil.  
15 In this work, Global Sensitivity Analysis (GSA) and parameter estimation procedures are  
16 performed to assess the influence of hydraulic and geophysical parameters on the SP signals  
17 and to investigate the identifiability of these parameters from SP measurements. Both  
18 procedures are applied to a synthetic column experiment involving a falling head infiltration  
19 phase followed by a drainage phase.

20 GSA is used through variance-based sensitivity indices, calculated using sparse Polynomial  
21 Chaos Expansion (PCE). To allow high PCE orders, we use an efficient sparse PCE algorithm  
22 which selects the best sparse PCE from a given data set using the Kashyap Information  
23 Criterion (KIC). Parameter identifiability is performed using two approaches: the Bayesian  
24 approach based on the Markov Chain Monte Carlo (MCMC) method and the First-Order  
25 Approximation (FOA) approach based on the Levenberg Marquardt algorithm. [The  
26 comparison between the two approaches allows to check whether FOA can provide reliable  
27 estimation of parameters and associated uncertainties for the investigated highly nonlinear  
28 hydrogeophysical problem.](#)

29 GSA results show that at short times, the saturated hydraulic conductivity ( $K_s$ ) and the  
30 voltage coupling coefficient at saturation ( $C_{sat}$ ) are the most influential parameters, whereas,  
31 at long times, the residual water content ( $\theta_r$ ), the Mualem-van Genuchten parameter ( $n$ ) and  
32 the Archies's saturation exponent ( $n_a$ ) become influential with strong interactions between  
33 them. The Mualem-van Genuchten parameter ( $\alpha$ ) has a very weak influence on the SP  
34 signals during the whole experiment.

35 Results of parameter estimation show that, although the studied problem is highly nonlinear,  
36 when several SP data collected at different altitudes inside the column are used to calibrate the  
37 model, all hydraulic ( $K_s, \theta_r, \alpha$  and  $n$ ) and geophysical ( $n_a$  and  $C_{sat}$ ) parameters can be  
38 reasonably estimated from the SP measurements. Further, in this case, the FOA approach  
39 provides accurate estimations of both mean parameter values and uncertainty regions.  
40 Conversely, when the number of SP measurements used for the calibration is strongly  
41 reduced, the FOA approach yields accurate mean parameter values (in agreement with  
42 MCMC results) but inaccurate and even unphysical confidence intervals for parameters with  
43 large uncertainty regions.

44

45 **Keywords**

46 Drainage experiment, Streaming Potential, Global Sensitivity Analysis, Markov chain Monte  
47 Carlo, parameter estimation.

## 48        **1. Introduction**

49    Flow through a charged porous medium can generate an electric potential (Zablocki, 1978;  
50    Ishido and Mizutani, 1981; Allegre et al., 2010; Jougnot and Linde, 2013), called Streaming  
51    Potential (SP). The SP signals play an important role in several applications related to  
52    hydrogeology and geothermal reservoir engineering as they are useful for examining  
53    subsurface flow dynamics. During the last decade, surface SP anomalies have been widely  
54    used to estimate aquifers hydraulic properties (Darnet et al., 2003). Interest on SP is  
55    motivated by its low-cost and high sensitivity to water flow. Either coupled or uncoupled  
56    approaches can be used for hydraulic parameter estimation from SP signals (Mboh et al.,  
57    2012). In the uncoupled approach, Darcy velocities (e.g., Jardani et al., 2007; Bolève et al.,  
58    2009) are obtained from tomographic inversion of SP signals and then used for the calibration  
59    of the hydrologic model. In the coupled approach, anomalies related to the tomographic  
60    inversion are avoided by inverting the full coupled hydrogeophysical model (Hinnell et al.,  
61    2010).

62    The SP signals have been widely studied in saturated porous media (Bogoslovsky and Ogilvy,  
63    1973; Patella, 1997; Sailhac and Marquis, 2001; Richards et al., 2010; Bolève et al., 2009,  
64    among others). Fewer studies focused on the application of the SP signal in unsaturated flow  
65    despite the big interest for such nonlinear problems (Linde et al., 2007; Allegre et al., 2010;  
66    Mboh et al., 2012; Jougnot and Linde, 2013). Hence, in this work we are interested in the SP  
67    signals in unsaturated porous media. Our main objective is to investigate the usefulness of the  
68    SP signals for the characterization of soil parameters. To this aim, we evaluate the impact of  
69    uncertain hydraulic and geophysical parameters on the SP signals and assess the identifiability  
70    of these parameters from the SP measurements.

71    The impact of soil parameters on SP signals is investigated using Global Sensitivity Analysis  
72    (GSA). This is a useful tool for characterizing the influential parameters that contribute the

73 most to the variability of model outputs (Saltelli et al.,1999; Sudret, 2008) and for  
74 understanding the behavior of the modeled system. GSA has been applied in several areas, as  
75 for risk assessment for groundwater pollution (e.g., Volkova et al., 2008), non-reactive  
76 (Fajraoui et al., 2011) and reactive transport experiments (Fajraoui et al., 2012; Younes et al.,  
77 2016), for unsaturated flow experiments (Younes et al., 2013), natural convection in porous  
78 media (Fajraoui et al., 2017) and seawater intrusion (Rajabi et al., 2015; Riva et al., 2015). To  
79 the best of our knowledge, GSA has never been used for SP signals in unsaturated porous  
80 media. Hence, in the first part of this study, GSA is performed on a conceptual model inspired  
81 from the laboratory experiment of Mboh et al. (2012) where SP signals are measured at  
82 different altitudes in a sandy soil column during a falling-head infiltration phase followed by a  
83 drainage phase. Four uncertain hydraulic parameters (saturated hydraulic conductivity  $K_s$ ,  
84 residual water content  $\theta_r$  and fitting Mualem-van Genuchten parameters  $\alpha$  and  $n$ ) and two  
85 geophysical parameters (Archies's saturation exponent  $n_a$  and voltage coupling coefficient at  
86 saturation  $C_{sat}$ ) are investigated. GSA of SP signals is performed by computing the variance-  
87 based sensitivity indices using Polynomial Chaos Expansion (PCE). To reduce the number of  
88 PCE coefficients while maintaining high PCE orders, we use the efficient sparse PCE  
89 algorithm developed by Shao et al. (2017) which selects the best sparse PCE from a given  
90 data set using the Kashyap Information Criterion (KIC).

91 In the second part of this study, we investigate the identifiability of hydro-geophysical  
92 parameters from SP measurements. To this aim, parameter estimation is performed using two  
93 different approaches. The first is a Bayesian approach in which model parameters are treated  
94 as random variables and characterized by their probability density functions. With this  
95 approach, the prior knowledge about the model and the observed data are merged to define  
96 the joint posterior probability distribution function of the parameters. In the sequel, Bayesian

97 analysis is conducted using the DREAM<sub>(ZS)</sub> software (Laloy and Vrugt, 2012; Vrugt, 2016)  
98 based on the Markov Chain Monte Carlo (MCMC) method. MCMC has been successfully  
99 used in various inverse problems (e.g., Vrugt et al., 2003, 2008; Arora et al., 2012; Younes et  
100 al., 2017). The MCMC method yields an ensemble of possible parameter sets that  
101 satisfactorily fit the available data. These sets are then employed to estimate the posterior  
102 parameter distributions and hence the optimal parameter values and the associated 95%  
103 Confidence Intervals (CIs) in order to quantify parameter's uncertainty. The second inversion  
104 approach is the commonly used First-Order Approximation (FOA) approach based on the  
105 standard Levenberg-Marquardt algorithm. Two scenarios are considered to check whether  
106 FOA can provide reliable estimation of parameters and associated uncertainties for the  
107 investigated highly nonlinear hydrogeophysical problem in the case of abundant data (small  
108 uncertainty regions) and in the case of scarcity of data (large uncertainty regions). In the first  
109 scenario, SP data collected from sensors at five different locations are taken into account for  
110 the calibration. In the second scenario; only the SP data from one sensor are used for model  
111 calibration.

112 The present study is decomposed as follows. Section 2 presents the hydrogeophysical model  
113 and the reference solution. Section 3 reports on the GSA results of SP signals. Then, Section 4  
114 discusses results of parameter estimation with both MCMC and FOA approaches for the two  
115 investigated scenarios.

## 116 **2. Test case description and numerical solution**

### 117 **2.1. Test case description**

118 The test case considered in this work is similar to the laboratory experiment developed in  
119 Mboh et al. (2012) involving a falling-head infiltration phase followed by a drainage phase  
120 (Figure 1). This experiment is representative of several laboratory SP experiments (Linde et

121 al., 2007; Allegre et al., 2010; Jougnot and Linde, 2013, among others). Quartz sand is evenly  
 122 packed in a plastic tube with an internal diameter of 5 cm to a height of  $L_s=117.5$  cm. The  
 123 column is initially saturated with a ponding of  $L_w=48$  cm above the soil surface. Five sensors  
 124 allowing SP measurements are installed at respectively 5, 29, 53, 77, and 101 cm from the  
 125 surface. The column has a zero pressure head maintained at its bottom. At the top of the  
 126 column, the boundary condition corresponds to a Dirichlet condition with a prescribed  
 127 pressure head condition during the falling-head phase followed by a Neumann condition with  
 128 zero infiltration flux during the drainage phase. During the falling-head phase, the prescribed  
 129 pressure head  $h_{top}$  has an exponential behavior driven by the saturated conductivity

130  $h_{top} = (L_s + L_w) e^{-\frac{K_s t}{L_s}} - L_s$ . The falling-head phase remains until the ponding vanishes at the

131 critical time  $t_c = -\frac{L_s}{K_s} \ln\left(\frac{L_s}{L_s + L_w}\right)$ .

## 132 2.2. Mathematical model

133 The total electrical current density  $\mathbf{j}$  [ $A\ m^{-2}$ ] is determined from the generalized Ohm's law  
 134 as follows:

$$135 \quad \mathbf{j} = -\sigma \nabla \varphi + \mathbf{j}_s \quad (1)$$

136 where  $\varphi$  [V] is the streaming potential,  $\mathbf{j}_s$  [ $A\ m^{-2}$ ] is the streaming current density and  $\sigma$  [S  
 137  $m^{-1}$ ] is the electrical conductivity distribution assumed isotropic.

138 Hence, the conservation equation ( $\nabla \cdot \mathbf{j} = 0$ ) writes

$$139 \quad \nabla \cdot (\sigma \nabla \varphi) = \nabla \cdot \mathbf{j}_s \quad (2)$$

140 Besides, the electrical conductivity distribution can be estimated using the saturation

141  $S_w = \theta/\theta_s$  as follows (Mboh et al., 2012)

$$142 \quad \sigma = \sigma_{sat} S_w^{n_a} \quad (3)$$

143 where  $\sigma_{sat}$  is the electric conductivity at saturation [S m<sup>-1</sup>] and  $n_a$  is the Archie's saturation  
 144 exponent (Archie, 1942).

145 The streaming current density  $j_s$  can be related to the Darcy velocity  $\mathbf{q}$  [cm min<sup>-1</sup>] by (Linde  
 146 et al., 2007 ; Revil et al., 2007)

$$147 \quad \mathbf{j}_s = \left( -\sigma_{sat} \frac{\rho g}{K_s} C_{sat} S_w \right) \mathbf{q} \quad (4)$$

148 where  $K_s$  is the saturated hydraulic conductivity [cm min<sup>-1</sup>],  $\rho$  is the water density [kg m<sup>-3</sup>],  
 149  $g$  is the gravitational acceleration [m s<sup>-2</sup>] and  $C_{sat}$  is the voltage coupling coefficient at  
 150 saturation [V Pa<sup>-1</sup>].

151 Hence, the combination of the previous equations (1-4) leads to the following partial  
 152 differential equation governing the SP signals:

$$153 \quad \nabla \cdot (S_w^{n_a} \nabla \varphi) = \nabla \cdot \left( -\frac{\rho g C_{sat} S_w}{K_s} \mathbf{q} \right) \quad (5)$$

154 On the other hand, the flow through an unsaturated soil column can be modelled by the one-  
 155 dimensional Richard's equation:

$$156 \quad \frac{\partial \theta}{\partial t} = \left( c(h) + S_s \frac{\theta}{\theta_s} \right) \frac{\partial H}{\partial t} = -\nabla \cdot \mathbf{q} \quad (6)$$

157 where  $H$  [cm] and  $h$  [cm] are respectively the hydraulic and pressure head such as  $H = h - z$  ;  
 158  $z$  [cm] is the depth (downward positive);  $S_s$  (-) is the specific storage;  $\theta_s$  [cm<sup>3</sup>.cm<sup>-3</sup>] and  $\theta$   
 159 are the saturated and actual water contents, respectively;  $c(h)$  [cm<sup>-1</sup>] is the specific moisture  
 160 capacity; and  $K(h)$  [cm min<sup>-1</sup>] is the hydraulic conductivity.

161 The water velocity  $\mathbf{q}$  is given from the Darcy's law:

$$162 \quad \mathbf{q} = -K(h) \nabla H \quad (6)$$



163 In the current study, the standard models of Mualem (1976) and Van Genuchten (1980) are  
 164 used to relate pressure head, hydraulic conductivity and water content,

$$165 \quad S_e(h) = \frac{\theta(h) - \theta_r}{\theta_s - \theta_r} = \begin{cases} \frac{1}{(1 + |\alpha h|^n)^m} & h < 0 \\ 1 & h \geq 0 \end{cases} \quad (7)$$

$$K(S_e) = K_s S_e^{1/2} \left[ 1 - (1 - S_e^{1/m})^m \right]^2$$

166 where  $S_e$  (-) is the effective saturation,  $\theta_r$  [ $\text{cm}^3 \text{ cm}^{-3}$ ] is the residual water content,  $K_s$   
 167 [ $\text{cm} \cdot \text{min}^{-1}$ ] is the saturated hydraulic conductivity,  $m = 1 - 1/n$ ,  $\alpha$  [ $\text{cm}^{-1}$ ] and  $n$  [-] are the  
 168 Mualem van-Genuchten shape parameters.

### 169 **2.3. Numerical model**

170 Although, several numerical techniques have been developed to for the solution of the  
 171 multidimensional Richards equation (e.g., Fahs et al., 2009; Belfort et al., 2009, Younes et al.,  
 172 2013; Deng and Wang, 2017), the standard finite volume method is used here for the spatial  
 173 discretization of the one dimensional Richard's equation (6). The integration of this equation  
 174 over the finite volume  $i$  between  $i-1/2$  and  $i+1/2$  gives

$$175 \quad \int_{i-1/2}^{i+1/2} \left( c(h) + S_s \frac{\theta}{\theta_s} \right) \frac{\partial H}{\partial t} dz = q_{i-1/2} - q_{i+1/2} \quad (8)$$

176 using expressions of the Darcy velocity at the element interfaces  $q_{i-1/2} = -\frac{K_{i-1/2}}{\Delta z} (H_i - H_{i-1})$

177 and  $q_{i+1/2} = -\frac{K_{i+1/2}}{\Delta z} (H_{i+1} - H_i)$  in the case of a uniform spatial discretization with a spatial

178 step  $\Delta z$ , we obtain,

$$179 \quad \Delta z \left( c_i + S_s \frac{\theta_i}{\theta_s} \right) \frac{\partial H_i}{\partial t} = K_{i+1/2} (H_{i+1} - H_i) - K_{i-1/2} (H_i - H_{i-1}) \quad (9)$$

180 Using  $\tau = S_w^{n_a}$  and  $\delta = \frac{\rho g C_{sat} S_w}{K_s}$ , the integration of the equation (5) over the finite volume  $i$

181 yields

$$182 \quad \frac{\tau_{i+1/2}}{\Delta z} (\varphi_{i+1} - \varphi_i) - \frac{\tau_{i-1/2}}{\Delta z} (\varphi_i - \varphi_{i-1}) - \delta_{i+1/2} K_{i+1/2} (H_{i+1} - H_i) + \delta_{i-1/2} K_{i-1/2} (H_i - H_{i-1}) = 0 \quad (10)$$

183 where the values at the interface  $\tau_{i\pm 1/2}$ ,  $\delta_{i\pm 1/2}$  and  $K_{i\pm 1/2}$  are calculated using the arithmetic

184 mean between adjacent elements (for instance,  $\tau_{i+1/2} = \frac{\tau_i + \tau_{i+1}}{2}$ ).

185 Then, the temporal discretization of the obtained nonlinear ODE/DAE system (9-10) is

186 performed with the method of lines (MOL) using the DASPCK (Brown et al., 1994) time

187 solver. The MOL is suitable for strongly nonlinear systems since it allows high order

188 temporal integration methods with formal error estimation and control (Miller et al., 1998;

189 Younes et al., 2009; Fahs et al., 2009, 2011). In the current study, the relative and absolute

190 local error tolerances are fixed to  $10^{-6}$ .

191 Numerical simulations are performed assuming typical MVG hydraulic parameters for the

192 sandy soil with (according to Carsel and Parrish, 1988)  $K_s = 0.495$  cm/min,  $\theta_s = 0.43$

193  $\text{cm}^3/\text{cm}^3$ ,  $\theta_r = 0.045$   $\text{cm}^3/\text{cm}^3$ ,  $\alpha = 0.145$   $\text{cm}^{-1}$  and  $n = 2.68$ . The voltage coupling coefficient

194 at saturation is  $C_{sat} = -2.910^{-7}$  V/Pa and the Archie's saturation exponent is  $n_a = 1.6$ .

195 Based on these hydraulic and geophysical parameters, a reference (mesh independent)

196 solution is obtained using a uniform mesh of 235 cells of 0.5 cm length. Data are generated by

197 sampling the output SP signals every 10 min during 1800 min. Figure 2 shows that the SP

198 signals have an almost linear behavior in the saturated falling-head phase. During the drainage

199 phase, they have a nonlinear behavior and approach the zero voltage for the dry conditions

200 occurring toward the end of the experiment. The SP signals are noised with independent

201 Gaussian random noises with a standard deviation of  $2.73 \cdot 10^{-5}$  V. This noise level was

202 obtained by Mboh et al. (2012) from laboratory measurements. The noised data (Figure 2) are  
203 used as “observations” in the calibration exercise.

### 204 **3. Global sensitivity analysis of SP signals**

#### 205 **3.1. GSA method**

206 The aim of GSA is to assess the effect of the variation of parameters on the model output  
207 (Mara and Tarantola, 2008). Such knowledge is important for determining the most influential  
208 parameters as well as their regions and periods of influence (Fajraoui et al., 2011). The  
209 sensitivity of a model to its parameters can be assessed using Variance-based sensitivity  
210 indices. These indices evaluate the contribution of each parameter to the variance of the  
211 model (Sobol’, 2001). The polynomial chaos theory (Wiener, 1938), has been largely used to  
212 perform variance-based sensitivity analysis of computer models (see for instance, Sudret,  
213 2008; Blatman and Sudret, 2010; Fajraoui et al., 2012; Younes et al., 2016; Shao et al., 2017;  
214 Mara et al., 2017). It can be stated that the PCE method is a surrogate-based approach.  
215 However, we argue that this method employs ANOVA (Analysis Of Variance) decomposition  
216 and hence can be considered as a spectral method (such as the Fourier amplitude sensitivity  
217 test, Cukier et al., 1973; Saltelli et al., 1999). Indeed, with this method, the sensitivity indices  
218 are directly obtained from the PCE coefficients without needing to run the surrogate model.

219 Let us consider a mathematical model with a random response  $f(\xi)$  which depends on  $d$   
220 independent random parameters  $\xi = \{\xi_1, \xi_2, \dots, \xi_d\}$ . With PCE,  $f(\xi)$  is expanded using a set  
221 of orthonormal multivariate polynomials (up to a polynomial degree  $p$ ):

$$222 \quad f(\xi) \approx \sum_{|\alpha| \leq p} s_\alpha \Psi_\alpha(\xi) \quad (8)$$

223 where  $\alpha = \alpha_1 \dots \alpha_d \in \mathbb{N}^d$  is a  $d^{\text{th}}$ -dimensional index. The  $s_\alpha$ 's are the polynomial coefficients  
 224 and  $\Psi_\alpha$ 's are the generalized polynomial chaos of degree  $|\alpha| = \sum_{i=1}^d \alpha_i$ , such as Hermite,  
 225 Legendre and Jacobi polynomials, for instance. In this work, Legendre polynomials are  
 226 employed because uniform distributions are considered for the parameters. The non-  
 227 informative uniform distributions are used here to express the absence of prior information  
 228 which makes all possible values of the parameter equally likely.

229 Equation (8) is similar to an ANOVA representation of the original model (Sobol' 1993),  
 230 from which it is straightforward to express  $V[f(\xi)]$ , the variance of  $f(\xi)$  as the sum of the  
 231 partial contribution of the inputs,

$$232 \quad V[f(\xi)] = \sum_{\alpha} s_{\alpha}^2, \quad (9)$$

233 The first-order sensitivity index  $S_i$  and the total sensitivity index  $ST_i$  are defined by

$$234 \quad S_i = \frac{V[E[f(\xi)|\xi_i]]}{V[f(\xi)]} \in [0,1], \quad (10)$$

$$235 \quad ST_i = \frac{E[V[f(\xi)|\xi_{\setminus i}]]}{V[f(\xi)]} \in [0,1], \quad (11)$$

236 where  $\xi_{\setminus i} = \xi \setminus \xi_i$ ,  $E[\cdot | \cdot]$  is the conditional expectation operator and  $V[\cdot | \cdot]$  the conditional  
 237 variance.  $S_i$  measures the amount of variance of  $f(\xi)$  due to  $\xi_i$  alone, while  $ST_i \geq S_i$   
 238 measures the amount of all contributions of  $\xi_i$  to the variance of  $f(\xi)$ , including its  
 239 cooperative non-linear contributions with the other parameters  $\xi_j$ . The input/output  
 240 relationship is said *additive* when  $ST_i = S_i, \forall i = 1, \dots, d$ , and in this case  $\sum_{i=1}^d S_i = 1$ .

241 In the sequel, a PCE is constructed for each SP signal at each observable time. The number of  
 242 coefficients for a full PCE representation is  $P = (d+p)!/(d!p!)$ . The evaluation of the PCE

243 coefficients requires at least  $P$  simulations of the nonlinear hydrogeophysical model. Note  
244 that  $P$  increases quickly with the order of the PCE and the number of parameters. Hence,  
245 several sparse PCE representations, where only the significant coefficients are sought, have  
246 been proposed in the literature in order to reduce the computational cost of the estimation of  
247 the Sobol indices. For instance, Blatman and Sudret (2010) developed a sparse PCE  
248 representation using an iterative forward-backward approach based on non-intrusive  
249 regression. Fajraoui et al., (2012) developed a technique where only the sensitive coefficients  
250 (that affect significantly model variance) are retained in the PCE. Recently, Shao et al.,  
251 (2017), developed an algorithm based on Bayesian Model Averaging (BMA) to select the best  
252 sparse PCE from a given data set using the Kashyap Information Criterion (KIC) (Kashyap,  
253 1982). The main idea of this algorithm is to increase progressively the degree of an initial  
254 PCE and compute the KIC until obtaining a satisfactory representation of model responses.  
255 This algorithm is used hereafter to compute the sensitivity indices of the SP signals.

256

### 257 **3.2. GSA results**

258 The SP responses are considered for uniformly distributed parameters over the large intervals  
259 shown in Table 1. These intervals include the reference values reported in Mboh et al. (2012).

260 The sensitivity indices of the six input parameters  $(K_s, \theta_r, \alpha, n, n_a, C_{sat})$  are estimated using an  
261 experimental design formed by  $N = 2^{12} = 4096$  parameter sets. The order of the sparse PCE is  
262 automatically adapted for each observable time and location. For some observable times, the  
263 PCE is highly sparse; it reaches a degree of 31 but contains only 112 nonzero coefficients.

264 Figure 3 depicts the temporal distribution of the streaming potential variance, represented by  
265 the blue curve, and the relative contribution of the parameters, represented by the shaded area.

266 This figure corresponds to the temporal ANOVA decomposition for the sensor 1 (at 5 cm

267 from the soil surface) and for the sensor 4 (at 77 cm from the soil surface). Interactions  
 268 between parameters are represented by the blank region between the variance curves and the  
 269 shaded area. Note that because Dirichlet boundary condition with zero SP is maintained at the  
 270 outlet boundary, the variance of the SP signal is zero at the bottom and reaches its maximum  
 271 value near the soil surface. Hence, the variance is higher for the first sensor, located at 5 cm  
 272 from the soil surface (Figure 3a) than for the sensor 4 located at 77 cm (Figure 3b).

273 The SP signals at different altitudes exhibit similar behavior (Figure 3). In the following, we  
 274 comment on the results of sensor 1 (Figure 3a). Because  $K_s$  varies between  $0.1 \text{ cm min}^{-1}$  and  
 275  $2 \text{ cm min}^{-1}$ , the saturated falling-head phase remains until the ponding vanishes at

276 
$$t_c = -\frac{L_s}{K_s} \ln\left(\frac{L_s}{L_s + L_w}\right).$$
 Depending on the value of  $K_s$  (see Table 1),  $t_c$  varies between  $t_1 = 20$

277 min and  $t_2 = 403$  min. Thus, in Figure 3a, we can see that during a first time period ( $t \leq t_1$ ),  
 278 the SP signal is strongly influenced by the value of the parameter  $C_{sat}$ . The first order and  
 279 total sensitivity indices at  $t = 10$  min (Table 2a) confirm that only the saturated parameters  $K_s$   
 280 and  $C_{sat}$  are influential.  $C_{sat}$  is about 17 times more influential than  $K_s$ . As expected, the  
 281 remaining parameters have no influence during the first period. The total variance is 0.72 mv  
 282 and there is no interaction between the two parameters  $K_s$  and  $C_{sat}$  since  $ST_i = S_i$  for both  
 283 and  $\sum_{i=1}^d S_i = 1$ .

284 During the second period ( $t_1 \leq t \leq t_2$ ), the flow is either saturated or unsaturated depending on  
 285 the value of  $K_s$ . Figure 3a shows that the variance of the SP signal exhibits its maximum  
 286 value around 2.4 mv with strong influences of the parameters  $K_s$  and  $C_{sat}$  and weak  
 287 interactions between them (small blank region between the variance curve and the shaded  
 288 area). These results are confirmed by the sensitivity indices calculated at  $t = 70$  min and

289 reported in Table 2a for the sensor 1. Both first order and total sensitivity indices indicate that  
 290  $K_s$  is the most influential parameter. The second influential parameter is  $C_{sat}$  which has a  
 291 total sensitivity index about 12 times less than  $K_s$ . The parameter  $\alpha$  is irrelevant since its  
 292 total sensitivity index is 109 times less than  $K_s$  and its partial variance is  
 293  $V_i = S_i \times V_T = 0.01mv$  which is less than the 95% confidence interval associated to the SP  
 294 measurement ( $\pm 0.055mv$ ). The total variance at  $t = 70$  min is calculated to be  $2.17mv$  and  
 295 the output/input relationship is close to be additive since  $\sum_{i=1}^d S_i = 0.94$  which means that  
 296 interactions between parameters exist but are not significant.

297 During the third period ( $t \geq t_2$ ), the variance of the SP signal reduces to 0.3 mv (Figure 3a)  
 298 and significant interactions are observed between parameters (large blank region between the  
 299 shaded area and the variance curve). Table 2a shows that for  $t = 800$  min, which corresponds  
 300 to dry conditions, the total variance is 0.22. First-order sensitivity indices are very small,  
 301 except for  $\theta_r$ . The latter is highly influential since it has a significant first-order sensitivity  
 302 index ( $S_i = 0.27$ ) and a more significant total- sensitivity index ( $ST_i = 0.74$ ). The parameters  
 303  $C_{sat}$  and  $K_s$  are irrelevant, they have very small first-order and total sensitivity indices.  
 304 Further, strong interactions are observed between the parameters since the sum of the first-  
 305 order indices is far from 1 ( $\sum_{i=1}^d S_i = 0.47$ ). The total sensitivity indices are significantly  
 306 different from first-order sensitivity indices for almost all parameters. For instance, the ratio  
 307 between these two indices is around 4 for  $\alpha$ , 5 for  $n_a$  and 7 for  $n$ . The total sensitivity index  
 308 of  $\alpha$  remains small (0.065), whereas, significant total sensitivity indices are obtained for  $n$  (  
 309  $ST_i = 0.27$ ) and  $n_a$  ( $ST_i = 0.47$ ) which indicates that these two parameters are influential

310 (although their first order sensitivity indices are small) because of interaction between  
311 parameters.

312 Figure 3b shows similar behavior for the sensor 4 located at 77 cm from the soil surface. The  
313 results in Table 2b indicate that the total variance observed at  $t = 10, 70$  and  $800$  min are  
314 around 8 times less than for the sensor 1. For the first time period, the first and total  
315 sensitivity indices are identical to those observed for the sensor 1 since saturated conditions  
316 occur inside the whole column and the same effect of  $K_s$  and  $C_{sat}$  can be observed whatever  
317 the location inside the column. For the second time period, the sensitivity indices for sensor 4  
318 (Table 2b) are similar to those observed for the sensor 1. However, the results for the third  
319 time period show an improvement of the relevance of the parameter  $\alpha$  with an increase of  
320 both first and total sensitivity indices. Indeed, compared to the results of the sensor1, both  
321 first order and total sensitivity indices have tripled. Moreover, the total sensitivity index for  $\alpha$   
322 ( $ST_i = 0.22$ ) becomes close to that of  $n$  ( $ST_i = 0.24$ ).

323 In summary, the GSA applied to SP signals identifies the influential parameters and their  
324 periods of influence and shows that

- 325 - the parameter  $C_{sat}$  is highly influential during the first time period ( $t \leq t_1$ ) where no  
326 interactions are observed between parameters;
- 327 - the parameter  $K_s$  is highly influential during the second time period ( $t_1 \leq t \leq t_2$ ) where  
328 small interactions occur between parameters;
- 329 - the parameters  $\theta_r$ ,  $n$  and  $n_a$  are influential during the third time period ( $t \geq t_2$ ) where  
330 dry conditions occur. During this period, strong interactions take place between  
331 parameters;



- 332 - the parameter  $\alpha$  has no influence on the SP signals during the two first periods and  
333 presents a very small influence ( $S_i = 0.015$  and  $ST_i = 0.065$ ) during the third period  
334 on the sensor 1 (near the surface of the column);
- 335 - the relevance of the parameter  $\alpha$  improves with the distance from the soil surface,  
336 although the total variance diminishes with respect to this distance. The influence of  
337  $\alpha$  becomes significant ( $ST_i = 0.22$ ) on the sensor 4 (located at 77 cm from the soil  
338 surface) during the third period.

## 339 **4. Parameter estimation**

### 340 **4.1. MCMC and FOA approaches**

341 Calibration of computer models is an essential task since some parameters (like the Mualem  
342 van-Genuchten shape parameters  $\alpha$  and  $n$ ) cannot be directly measured. In such an exercise,  
343 the unknown model parameters are investigated by facing the model responses to the  
344 observations. Recently, Mboh et al. (2012) showed that inversion of SP signals can yield  
345 accurate estimate of the saturated hydraulic conductivity  $K_s$ , the MVG fitting parameters  $\alpha$   
346 and  $n$  and the Archie's saturation exponent ( $n_a$ ). Moreover, they showed that the quality of  
347 the estimation was comparable to that obtained from the calibration of pressure heads. In their  
348 study, Mboh et al. (2012) used the FOA approach with the Shuffled Complex Evolution  
349 optimization algorithm SCE-UA (Duan et al., 1993).

350 As important as the determination of the optimal parameter sets are the associated 95%  
351 Confidence Intervals (CIs) to quantify uncertainty on the estimated values. The determination  
352 of CIs is not straightforward if the observed model responses are highly nonlinear functions of  
353 model parameters (Christensen and Cooley, 1999). In the sequel, parameter estimation is  
354 performed using two approaches: the popular FOA approach and the Bayesian approach  
355 based on the Markov chain Monte Carlo (MCMC) sampler. **Contrarily to FOA, the MCMC**

356 method is robust since no assumptions of model linearity or differentiability are required.  
 357 Furthermore, prior information available for the parameters can be included. MCMC provides  
 358 not only an optimal point estimate of the parameters but also a quantification of the entire  
 359 parameter space. Several MCMC strategies have been developed for Bayesian sampling of  
 360 the parameter space (Gallagher and Doherty, 2007; Vrugt, 2016). In groundwater and vadose  
 361 zone modeling context, the most widely used of these strategies is the Metropolis Hastings  
 362 algorithm (Metropolis et al., 1953; Hastings, 1970). It proceeds as follows (Gelman et al.,  
 363 1996):

364 i. Choose an initial candidate  $\mathbf{x}^0 = (\boldsymbol{\xi}^0, \sigma^0)$  formed by the initial estimate of the  
 365 parameter set  $\boldsymbol{\xi}^0$  and the hyperparameter  $\sigma^0$  and a proposal distribution  $q$  that  
 366 depends on the previous accepted candidate.

367 ii. A new candidate  $\mathbf{x}^i = (\boldsymbol{\xi}^i, \sigma^i)$  is generated from the current one  $\mathbf{x}^{i-1}$  with the  
 368 generator  $q(\mathbf{x}^i | \mathbf{x}^{i-1})$  associated with the transition probability  $p(\boldsymbol{\xi}^i | \mathbf{y}_{mes}, \sigma)$ .

369 iii. Calculate  $p(\boldsymbol{\xi}^i | \mathbf{y}_{mes}, \sigma)$  and compute the ratio  $\alpha = \frac{p(\boldsymbol{\xi}^i | \mathbf{y}_{mes}, \sigma)q(\mathbf{x}^i | \mathbf{x}^{i-1})}{p(\boldsymbol{\xi}^{i-1} | \mathbf{y}_{mes}, \sigma)q(\mathbf{x}^{i-1} | \mathbf{x}^i)}$ .

370 Additionally, draw a random number  $u \in [0, 1]$  from a uniform distribution.

371 iv. If  $\alpha \geq u$ , then accept the new candidate, otherwise it is rejected.

372 v. Resume from (ii) until the chain  $\{\mathbf{x}^0, \dots, \mathbf{x}^k\}$  converges or a prescribed number of  
 373 iterations  $i_{\max}$  is reached.

374 Many improvements have been proposed in the literature to accelerate the MCMC  
 375 convergence rate (e.g., Haario et al., 2006; ter Braak and Vrugt, 2008; Dostert et al., 2009,  
 376 among others). Vrugt et al. (2009a, 2009b) developed the DREAM MCMC sampler based on  
 377 the differential evolution–Markov Chain method of ter Braak (2006) to improve sampling

378 efficiency. DREAM runs multiple Markov chains in parallel and uses subspace sampling and  
379 outlier chain correction to speed up MCMC convergence (Vrugt, 2016). Laloy and Vrugt  
380 (2012) developed the DREAM<sub>(ZS)</sub> MCMC sampler in which a candidate for each chain is  
381 drawn from an archive of past states denoted Z which plays the role of the generator  $q$ . The  
382 interested readers are referred to Vrugt (2016) for more details about properties and  
383 implementation of DREAM and DREAM<sub>(ZS)</sub>. In the current study, the DREAM<sub>(ZS)</sub> software is  
384 used for the MCMC estimation of the hydrogeophysical parameters. Note that because of the  
385 large number of model evaluations required, the MCMC method remains rarely used in  
386 practical applications compared to the FOA approach. Indeed, with FOA, the CIs are  
387 estimated once by assuming that the Jacobian remains constant within the CIs. This  
388 assumption was found to be reasonably accurate in nonlinear problems by Donaldson and  
389 Scnabel (1987). However, recently, several authors stated that parameter interdependences  
390 and model nonlinearities violate this assumption (see for instance, Vrugt and Bouten, 2002;  
391 Vurgin et al. 2007; Gallagher and Doherty, 2007; Mertens et al., 2009; Kahl et al., 2015).  
392 In the following, both MCMC and FOA approaches are employed for the inversion of the  
393 highly nonlinear hydrogeophysical problem using SP measurements.

394

#### 395 **4.2. Parameter estimation results**

396 Hydrogeophysical parameters are estimated using the DREAM<sub>(ZS)</sub> MCMC sampler (Laloy  
397 and Vrugt, 2012). Independent uniform distributions are considered for model parameter  
398 priors and likelihood hyperparameters (see Table 1). The parameter posterior distribution  
399 writes:

$$400 \quad p(\xi / \mathbf{y}_{mes}, \sigma) \propto \sigma^{-N} \exp\left(-\frac{SS(\xi)}{2\sigma^2}\right) \quad (9)$$

401 where  $SS(\xi) = \sum_{k=1}^N \left( y_{mes}^{(k)} - y_{mod}^{(k)}(\xi) \right)^2$  is the sum of the squared differences between the  
402 observed  $y_{mes}^{(k)}$  and modeled  $y_{mod}^{(k)}$  SP signals at time  $t_k$  for  $N$  total number of SP  
403 observations.

404 The DREAM<sub>(ZS)</sub> software computes multiple sub-chains in parallel to thoroughly explore the  
405 parameter space. Taking the last 25% of individuals (when the chains have converged) yields  
406 multiple sets used to estimate the updated parameter distributions and therefore the optimal  
407 parameter values and their CIs. In the sequel, the DREAM<sub>(ZS)</sub> MCMC sampler is used with 3  
408 parallel chains.

409 We assume that the saturated water content has been initially measured with a fair degree of  
410 accuracy. However, instead of fixing its value (as in Kool et al. (1987), van Dam et al. (1994),  
411 Nützmänn et al., (1998) among others), we assign to  $\theta_s$  a Gaussian distribution to take into  
412 account associated uncertainty and its effect on the estimation of the rest of parameters. It is  
413 assumed here that the saturated water content was accurately measured to be  $\theta_s = 0.43$   
414  $\text{cm}^3.\text{cm}^{-3}$  by weighing the saturated soil. The corresponding error measurements are  
415 independently and normally distributed with a zero mean and a standard deviation  $\sigma_\theta = 0.01$   
416  $\text{cm}^3.\text{cm}^{-3}$ . Hence a Gaussian distribution is assigned to  $\theta_s$  with a mean value of  $0.43 \text{ cm}^3.\text{cm}^{-3}$   
417  $^3$  and a 95% CI  $[0.41-0.45] \text{ cm}^3.\text{cm}^{-3}$ . The rest of hydrogeophysical parameters have non  
418 informative uniform distributions over the ranges reported in Table 1. The error  
419 (measurement) variance is also considered unknown and is simultaneously estimated with the  
420 physical parameters. Two scenarios are considered to check whether the FOA approach can  
421 provide reliable estimation of parameters and associated uncertainties for the investigated  
422 highly nonlinear hydrogeophysical problem both in the case of abundant data (small  
423 uncertainty regions) and in the case of scarcity of data (large uncertainty regions). In the first  
424 scenario, SP data collected from the sensors located at the five locations are taken into

425 account for the calibration. In the second scenario; only the SP data from the first sensor  
426 located at 5 cm from the soil surface serve as conditioning information for model calibration.  
427 Results of the MCMC sampler are compared to those of FOA approach for both scenarios.

428 *Scenario 1: Inversion using all SP measurements*

429 The Figure 4 shows the results obtained with MCMC when the SP data of the five sensors are  
430 used for the calibration. The "on-diagonal" plots in this figure display the posterior parameter  
431 distributions, whereas the "off-diagonal" plots represent the correlations between parameters  
432 in the MCMC sample. Figure 4 shows *nearly* bell-shaped posterior distributions for all  
433 parameters. A strong correlation is observed between  $\theta_r$  and  $n_a$  ( $r = 0.98$ ).

434 From the obtained MCMC sample, it is straightforward to estimate the posterior 95%  
435 confidence interval of each parameter. The latter as well as the mean estimate value of each  
436 parameter obtained with both MCMC and FOA approaches are reported in Table 3.

437 The results this table show that the parameters are well estimated from the SP measurements  
438 since (i) identified mean values are very close to the reference solution, (ii) all confidence  
439 intervals include the reference solution and (iii) the confidence intervals are rather narrow.

440 The saturated parameters  $K_s$  and  $C_{sat}$  are very well estimated (with CIs around 2%) because  
441 of data collected during the falling-head phase where only these two parameters are  
442 influential.

443 The posterior CI of the parameter  $\theta_s$  is similar to its prior CI. The parameter  $\alpha$  is reasonably  
444 well estimated with a CI around 35%. Recall that this parameter had very small first-order and  
445 total sensitivity indices for sensor 1 but had more significant sensitivity indices for the sensors  
446 away from the soil surface (see results for sensor 4 in Table 2b). The parameter  $\theta_r$  is  
447 estimated with a CI around 90% although it was highly influential for all sensors (for  
448 instance, a first-order sensitivity index of 0.27 and a total order of 0.74 for sensor 1). The

449 parameters  $n$  and  $n_a$  had similar GSA behavior with small first-order sensitivities  
450 (respectively 0.038 and 0.094 for sensor 1) and large total sensitivities (respectively 0.266 and  
451 0.4715 for sensor 1), however, the inversion shows that the parameter  $n$  is well estimated  
452 with a CI less than 10% whereas the parameter  $n_a$  is less well estimated with a CI around  
453 35%. These results suggest that GSA outcomes should be interpreted with caution in the  
454 context of parameter estimation since (i) a parameter which is not relevant for the model  
455 output in one sensor can be influential for another sensor and (ii) GSA does not presume on  
456 the quality of the estimation since two parameters with similar sensitivity indices can have  
457 different quality of estimation by the inversion procedure.

458 Further, the results of Table 3 show that FOA and MCMC approaches yield similar mean  
459 estimated values. Moreover, very good agreement is observed between FOA and MCMC  
460 uncertainty bounds. Concerning the efficiency of the two calibration methods for this  
461 scenario, the FOA approach is by far the most efficient method since it requires only 95s of  
462 CPU time. The MCMC method was terminated after 16,000 model runs which required  
463 14,116s. The convergence was reached at around 12,000 model runs. The last 4,000 runs were  
464 used to estimate the statistical measures of the posterior distribution. [Recall that that](#)  
465 [contrarily to FOA, MCMC can include prior information available for the parameters and](#)  
466 [allows a quantification of the entire parameter space.](#)

467

468 *Scenario 2: Inversion using only SP measurements near the surface*

469 In this scenario, the number of measurements used for the calibration is strongly reduced.  
470 Only SP measurements from sensor 1 (located at 5 cm below soil surface) are considered.

471 The results of MCMC are plotted in the Figure 5. The correlation observed between  $\theta_r$  and  
472  $n_a$  decreases slightly to  $r = 0.95$ . Almost bell-shaped posterior distributions are observed for  
473 all parameters except for the parameters  $\theta_r$  and  $\alpha$ .

474 The results obtained with MCMC and FOA approaches depicted in Table 4 show that

- 475 - The FOA approach yields accurate mean estimated values similar to MCMC results  
476 for all parameters;
- 477 - The MCMC and FOA mean estimated values are close to the reference solution and to  
478 the previous scenario. The maximum difference is observed for  $\theta_r$  for which the  
479 mean estimated value with scenario 2 is 15% greater than for scenario 1
- 480 - The MCMC CIs for the parameters  $K_S$ ,  $\theta_s$ ,  $n$  and  $C_{sat}$  are close to the previous  
481 scenario. The parameters  $\theta_s$  and  $n$  are well estimated (CIs < 10%) and the  
482 parameters  $K_S$  and  $C_{sat}$  are very well estimated (CIs  $\leq 5\%$ ).
- 483 - Due to the reduction of the number of data used for model calibration in the scenario  
484 2, the MCMC CIs for the parameters  $n_a$ ,  $\alpha$  and  $\theta_r$  are much larger than in the  
485 previous scenario. Indeed, compared to scenario 1, the CI for  $n_a$  and  $\theta_r$  increases by  
486 around 60% whereas the CI of  $\alpha$  is 3 times larger than for the scenario 1.
- 487 - The FOA method yields accurate CIs for the parameters  $\theta_s$ ,  $n$ ,  $n_a$  and  $C_{sat}$  whereas it  
488 overestimates the CIs of  $\theta_r$  (by 24%),  $K_S$  (by 100%) and  $\alpha$  (by 427%). Unphysical  
489 uncertainty region (including negative values) is obtained for the parameter  $\alpha$

490 These results show that the FOA can fail to provide realistic parameter uncertainties and can  
491 yield larger CIs than their corresponding nonlinear MCMC counterpart. Indeed, the  
492 linearization in the FOA method assumes that the Jacobian remains constant across the CIs.  
493 This assumption was quite fulfilled for the first scenario in which a large number of

494 measurements insured small uncertainty regions. However, the assumption is not fulfilled for  
495 some parameters of the current scenario because of the large uncertainty regions induced by  
496 the reduction of the number of SP measurements.

497 Concerning the efficiency of the calibration methods, the FOA required approximately 174s  
498 of CPU time, the MCMC required much more runs to reach the convergence than in the  
499 previous scenario. Indeed, the sampler was used with 50,000 runs (35,000 runs were  
500 necessary to reach the convergence).

#### 501 **4. Conclusions**

502 In this work, a synthetic test case dealing with SP signals during drainage experiment has  
503 been studied. The test case is similar to the laboratory experiment developed in Mboh et al.  
504 (2012) involving a falling-head infiltration phase followed by a drainage phase. GSA and  
505 Bayesian parameter inference have been applied to investigate (i) the influence of hydraulic  
506 and geophysical parameters on the SP signals and (ii) the identifiability of hydro-geophysical  
507 parameters using only SP measurements. The GSA was performed using variance-based  
508 sensitivity indices which allow measuring the contribution of each parameter (alone or by  
509 interaction with other parameters) to the output variance. The sensitivity indices have been  
510 calculated using a PCE representation of the SP signals. To reduce the number of coefficients  
511 and explore PCE with high orders, we used the efficient sparse PCE algorithm developed by  
512 Shao et al. (2017) which selects the best sparse PCE from a given data set using the Kashyap  
513 Information Criterion (KIC).

514 The GSA applied to SP signals showed that the parameters  $C_{sat}$  and  $K_s$  are highly influential  
515 during the first period corresponding to saturated conditions. The parameters  $\theta_r$ ,  $n$  and  $n_a$   
516 are influential when dry conditions occur. In such conditions, strong interactions take place  
517 between these parameters. The parameter  $\alpha$  has a very small influence on the SP signals near



518 the soil surface but its sensitivity increases with depth although the total variance decreases  
519 with depth.

520 Parameter estimation has been performed using MCMC and FOA approaches to check  
521 whether FOA can provide reliable estimation of parameters and associated uncertainties for  
522 the investigated highly nonlinear hydrogeophysical problem. All hydraulic ( $K_s$ ,  $\theta_r$ ,  $\alpha$  and  
523  $n$ ) and geophysical ( $n_a$  and  $C_{sat}$ ) parameters can be reasonably estimated in the first scenario  
524 when the whole SP data (measured at five different locations) are used as conditioning  
525 information for the model calibration. The confrontation with GSA results shows that the  
526 latter should be interpreted with caution when used in the context of parameter estimation  
527 since (i) a parameter which is not relevant for the model output in one sensor can be  
528 influential for another sensor and (ii) GSA does not presume on the quality of the estimation  
529 since two parameters with similar sensitivity indices can have different quality of estimation  
530 by the inverse procedure (see for instance, parameters  $n$  and  $n_a$ ). Furthermore, although the  
531 studied problem is highly nonlinear, the FOA approach provides accurate estimations of both  
532 mean parameter values and CIs in the first scenario. These results are identical to those  
533 obtained with MCMC.

534 When the number of SP measurements used for the calibration is considerably reduced  
535 (scarcity of data), the MCMC inversion provides larger parameters' uncertainty regions. The  
536 FOA approach yields accurate mean parameter values (in agreement with MCMC results) but  
537 inaccurate and even unphysical CIs for some parameters with large uncertainty regions.

538

## References

- Allègre, V., Jouniaux, L., Lehmann, F. and Sailhac, P.: Streaming potential dependence on water-content in Fontainebleau sand, *Geophysical Journal International*, 182(3), 1248–1266, doi:10.1111/j.1365-246X.2010.04716.x, 2010.
- Archie, G. E.: The Electrical Resistivity Log as an Aid in Determining Some Reservoir Characteristics, *Transactions of the AIME*, 146(01), 54–62, doi:10.2118/942054-G, 1942.
- Arora, B., Mohanty, B. P. and McGuire, J. T.: Uncertainty in dual permeability model parameters for structured soils, *Water Resources Research*, 48(1), doi:10.1029/2011WR010500, 2012.
- Belfort, B., Ramasomanan, F., Younes, A., Lehmann, F.: An efficient Lumped Mixed Hybrid Finite Element Formulation for variably saturated groundwater flow. *Vadoze Zone Journal*. 8 (2), 352-362, doi: 10.2136/vzj2008.0108, 2009.
- Blatman, G. and Sudret, B.: Efficient computation of global sensitivity indices using sparse polynomial chaos expansions, *Reliability Engineering & System Safety*, 95(11), 1216–1229, doi:10.1016/j.res.2010.06.015, 2010.
- Bolève, A., Revil, A., Janod, F., Mattiuzzo, J.L. and Fry, J.-J.: Preferential fluid flow pathways in embankment dams imaged by self-potential tomography. *Near Surf. Geophys.* 7:447–462. doi:10.3997/1873-0604.2009012, 2009.
- Bogoslovsky, V.A. and Ogilvy, A.A.: Deformation of natural electric fields near drainage structures. *Geophys. Prospect.* 21:716–723. doi:10.1111/j.1365-2478.1973.tb00053, 1973.
- ter Braak, C.J.F.: A Markov Chain Monte Carlo version of the genetic algorithm differential evolution: Easy Bayesian computing for real parameter spaces. *Stat Comput.* 16:239–249. doi: 10.1007/s11222-006-8769-1, 2006.
- ter Braak, C. J. F. and Vrugt, J. A.: Differential Evolution Markov Chain with snooker updater and fewer chains, *Statistics and Computing*, 18(4), 435–446, doi:10.1007/s11222-008-9104-9, 2008.
- Brown, P.N., Hindmarsh, A.C. and Petzold, L.R.: Using Krylov Methods in the Solution of Large-Scale Differential-Algebraic Systems, *SIAM J. Sci. Comp.*, 15, pp. 1467-1488. doi:10.1137/0915088, 1994.
- Carsel, R. F. and Parrish, R. S.: Developing joint probability distributions of soil water retention characteristics. *Water Resources Research*, 24 (5), 755–769,doi: 10.1029/WR024i005p00755,1988.
- Christensen, S. and Cooley, R. L.: Evaluation of confidence intervals for a steady-state leaky aquifer model, *Advances in Water Resources*, 22(8), 807–817, doi:10.1016/S0309-1708(98)00055-4, 1999.
- Cukier, R. I., Fortuin, C. M., Shuler, K. E., Petschek, A. G., Schaibly, J. H.: Study of the sensitivity of coupled reaction systems to uncertainties in rate coefficients. I. theory. *J. Chemical Physics* 59, 3873–3878. 1973.

van Dam, J. C., Stricker, J. N. M. and Droogers, P.: Inverse Method to Determine Soil Hydraulic Functions from Multistep Outflow Experiments, *Soil Science Society of America Journal*, 58(3), 647, doi:10.2136/sssaj1994.036159955005800030002x, 1994.

Darnet, M., Marquis, G. and Sailhac, P.: Estimating aquifer hydraulic properties from the inversion of surface Streaming Potential (SP) anomalies, *Geophysical Research Letters*, 30(13), doi:10.1029/2003GL017631, 2003.

Deng, B., Wang, J.: Saturated-unsaturated groundwater modeling using 3D Richards equation with a coordinate transform of nonorthogonal grids. *Applied Mathematical Modelling*, 50:39–52. doi:10.1016/j.apm.2017.05.021; 2017.

Donaldson, J. R. and Schnabel, R. B.: Computational Experience with Confidence Regions and Confidence Intervals for Nonlinear Least Squares, *Technometrics*, 29(1), 67, doi:10.2307/1269884, 1987.

Dostert, P., Efendiev, Y. and Mohanty, B.: Efficient uncertainty quantification techniques in inverse problems for Richards' equation using coarse-scale simulation models, *Advances in Water Resources*, 32(3), 329–339, doi:10.1016/j.advwatres.2008.11.009, 2009.

Duan, Q. Y., Gupta, V. K. and Sorooshian, S.: Shuffled complex evolution approach for effective and efficient global minimization, *Journal of Optimization Theory and Applications*, 76(3), 501–521, doi:10.1007/BF00939380, 1993.

Fahs, M., Younes, A. and Lehmann, F.: An easy and efficient combination of the Mixed Finite Element Method and the Method of Lines for the resolution of Richards' Equation, *Environmental Modelling & Software*, 24(9), 1122–1126, doi:10.1016/j.envsoft.2009.02.010, 2009.

Fahs, M., Younes, A. and Ackerer, P.: An Efficient Implementation of the Method of Lines for Multicomponent Reactive Transport Equations, *Water, Air, & Soil Pollution*, 215(1–4), 273–283, doi:10.1007/s11270-010-0477-y, 2011.

Fajraoui, N., Ramasomanana, F., Younes, A., Mara, T. A., Ackerer, P. and Guadagnini, A.: Use of global sensitivity analysis and polynomial chaos expansion for interpretation of nonreactive transport experiments in laboratory-scale porous media, *Water Resources Research*, 47(2), doi:10.1029/2010WR009639, 2011.

Fajraoui, N., Mara, T. A., Younes, A. and Bouhlila, R.: Reactive Transport Parameter Estimation and Global Sensitivity Analysis Using Sparse Polynomial Chaos Expansion, *Water, Air, & Soil Pollution*, 223(7), 4183–4197, doi:10.1007/s11270-012-1183-8, 2012.

Fajraoui, N., Fahs, M., Younes, A. and Sudret, B.: Analyzing natural convection in porous enclosure with polynomial chaos expansions: Effect of thermal dispersion, anisotropic permeability and heterogeneity, *International Journal of Heat and Mass Transfer*, 115, 205–224, doi:10.1016/j.ijheatmasstransfer.2017.07.003, 2017.

Gallagher, M., and Doherty, J.: Parameter estimation and uncertainty analysis for a watershed model, *Environmental Modelling & Software*, 22(7), 1000–1020, doi:10.1016/j.envsoft.2006.06.007, 2007.

Gelman, A., Carlin, J., Stern, H. Rubin, D.: Bayesian Data Analysis, Second Edition, London, Great Britain: Chapman Hall. 696 p. ISBN: 0-158-48838-8, 1996.

van Genuchten, M. T.: A Closed-form Equation for Predicting the Hydraulic Conductivity of Unsaturated Soils, Soil Science Society of America Journal, 44(5), 892, doi:10.2136/sssaj1980.03615995004400050002x, 1980.

Haario, H., Laine, M., Mira, A. and Saksman, E.: DRAM: Efficient adaptive MCMC, Statistics and Computing, 16(4), 339–354, doi:10.1007/s11222-006-9438-0, 2006.

Hastings, W. K.: Monte Carlo Sampling Methods Using Markov Chains and Their Applications, Biometrika, 57(1), 97, doi:10.2307/2334940, 1970.

Hinnell, A. C., Ferré, T. P. A., Vrugt, J. A., Huisman, J. A., Moysey, S., Rings, J. and Kowalsky, M. B.: Improved extraction of hydrologic information from geophysical data through coupled hydrogeophysical inversion, Water Resources Research, 46(4), doi:10.1029/2008WR007060, 2010.

Ishido, T., and Mizutani, H.: Experimental and theoretical basis of electrokinetic phenomena in rock–water systems and its applications to geophysics. J. Geophys. Res. 86:1763–1775. doi:10.1029/JB086iB03p01763, 1981.

Jardani, A., Revil, A., Bolève, A., Crespy, A., Dupont, J.-P., Barrash, W. and Malama, B.: Tomography of the Darcy velocity from self-potential measurements, Geophysical Research Letters, 34(24), doi:10.1029/2007GL031907, 2007.

Jougnot, D. and Linde, N.: Self-Potentials in Partially Saturated Media: The Importance of Explicit Modeling of Electrode Effects, Vadose Zone Journal, 12(2), 0, doi:10.2136/vzj2012.0169, 2013.

Kahl, G. M., Sidorenko, Y. and Gottesbüren, B.: Local and global inverse modelling strategies to estimate parameters for pesticide leaching from lysimeter studies: Inverse modelling to estimate pesticide leaching parameters from lysimeter studies, Pest Management Science, 71(4), 616–631, doi:10.1002/ps.3914, 2015.

Kayshap, R.L.: Optimal choice of AR and MA parts in autoregressive moving average models, IEEE Trans. Pattern Anal. Machine Intell. 4(2), 99-104, 1982.

Kool, J. B., Parker, J. C. and van Genuchten, M. T.: Parameter estimation for unsaturated flow and transport models — A review, Journal of Hydrology, 91(3–4), 255–293, doi:10.1016/0022-1694(87)90207-1, 1987.

Laloy, E. and Vrugt, J. A.: High-dimensional posterior exploration of hydrologic models using multiple-try DREAM<sub>(ZS)</sub> and high-performance computing, Water Resources Research, 48(1), doi:10.1029/2011WR010608, 2012.

Linde, N., Jougnot, D., Revil, A., Matthäi, S. K., Arora, T., Renard, D. and Doussan, C.: Streaming current generation in two-phase flow conditions, Geophysical Research Letters, 34(3), doi:10.1029/2006GL028878, 2007.

Mara, T. A. and Tarantola, S.: Application of global sensitivity analysis of model output to

building thermal simulations, *Building Simulation*, 1(4), 290–302, doi:10.1007/s12273-008-8129-5, 2008.

Mara, T. A., Belfort, B., Fontaine, V. and Younes, A.: Addressing factors fixing setting from given data: A comparison of different methods, *Environmental Modelling & Software*, 87, 29–38, doi:10.1016/j.envsoft.2016.10.004, 2017.

Mboh, C. M., Huisman, J. A., Zimmermann, E. and Vereecken, H.: Coupled Hydrogeophysical Inversion of Streaming Potential Signals for Unsaturated Soil Hydraulic Properties, *Vadose Zone Journal*, 11(2), 0, doi:10.2136/vzj2011.0115, 2012.

Mertens, J., Kahl, G., Gottesbüren, B. and Vanderborght, J.: Inverse Modeling of Pesticide Leaching in Lysimeters: Local versus Global and Sequential Single-Objective versus Multiobjective Approaches, *Vadose Zone Journal*, 8(3), 793, doi:10.2136/vzj2008.0029, 2009.

Metropolis, N., Rosenbluth, A. W., Rosenbluth, M. N., Teller, A. H. and Teller, E.: Equation of State Calculations by Fast Computing Machines, *The Journal of Chemical Physics*, 21(6), 1087–1092, doi:10.1063/1.1699114, 1953.

Miller, C. T., Williams, G. A., Kelley, C. T. and Tocci, M. D.: Robust solution of Richards' equation for nonuniform porous media, *Water Resources Research*, 34(10), 2599–2610, doi:10.1029/98WR01673, 1998.

Mualem, Y.: A new model for predicting the hydraulic conductivity of unsaturated porous media, *Water Resources Research*, 12(3), 513–522, doi:10.1029/WR012i003p00513, 1976.

Nützmann, G., Thiele, M., Maciejewski, S. and Joswig, K.: Inverse modelling techniques for determining hydraulic properties of coarse-textured porous media by transient outflow methods, *Advances in Water Resources*, 22(3), 273–284, doi:10.1016/S0309-1708(98)00009-8, 1998.

Patella, D.: Introduction to ground surface self-potential tomography. *Geophys. Prospect.* 45:653–681. doi:10.1046/j.1365-2478.1997.430277, 1997.

Rajabi, M. M., Ataie-Ashtiani, B. and Simmons, C. T.: Polynomial chaos expansions for uncertainty propagation and moment independent sensitivity analysis of seawater intrusion simulations, *Journal of Hydrology*, 520, 101–122, doi:10.1016/j.jhydrol.2014.11.020, 2015.

Revil, A., Linde, N., Cerepi, A., Jougnot, D., Matthäi, S. and Finsterle, S.: Electrokinetic coupling in unsaturated porous media, *Journal of Colloid and Interface Science*, 313(1), 315–327, doi:10.1016/j.jcis.2007.03.037, 2007.

Richards, K., Revil, A., Jardani, A., Henderson, F., Batzle, M., and Haas, A.: Pattern of shallow ground water flow at Mount Princeton Hot Springs, Colorado, using geoelectric methods. *J. Volcanol. Geotherm. Res.* 198:217–232. doi:10.1016/j.jvolgeores.2010.09.001, 2010.

Riva, M., Guadagnini, A. and Dell'Oca, A.: Probabilistic assessment of seawater intrusion under multiple sources of uncertainty, *Advances in Water Resources*, 75, 93–104, doi:10.1016/j.advwatres.2014.11.002, 2015.

Sailhac, P. and Marquis, G.: Analytic potentials for the forward and inverse modeling of SP anomalies caused by subsurface fluid flow, *Geophysical Research Letters*, 28(9), 1851–1854, doi:10.1029/2000GL012457, 2001.

Saltelli, A., Tarantola, S. and Chan, K. P.-S.: A Quantitative Model-Independent Method for Global Sensitivity Analysis of Model Output, *Technometrics*, 41, 39–56, doi:10.1080/00401706.1999.10485594, 1999.

Shao, Q., Younes, A., Fahs, M. and Mara, T. A.: Bayesian sparse polynomial chaos expansion for global sensitivity analysis, *Computer Methods in Applied Mechanics and Engineering*, 318, 474–496, doi:10.1016/j.cma.2017.01.033, 2017.

Sobol', I. .: Global sensitivity indices for nonlinear mathematical models and their Monte Carlo estimates, *Mathematics and Computers in Simulation*, 55(1–3), 271–280, doi:10.1016/S0378-4754(00)00270-6, 2001.

Sobol', I. M.: Sensitivity estimates for nonlinear mathematical models, *Math. Model. Comput. Exp.*, 407–414, 1993.

Sudret, B.: Global sensitivity analysis using polynomial chaos expansions, *Reliability Engineering & System Safety*, 93(7), 964–979, doi:10.1016/j.ress.2007.04.002, 2008.

Volkova, E., Iooss, B. and Van Dorpe, F.: Global sensitivity analysis for a numerical model of radionuclide migration from the RRC “Kurchatov Institute” radwaste disposal site, *Stochastic Environmental Research and Risk Assessment*, 22(1), 17–31, doi:10.1007/s00477-006-0093-y, 2008.

Vrugt, J., Gupta, H. V., Bouten, W. and Sorooshian, S.: A Shuffled Complex Evolution Metropolis algorithm for optimization and uncertainty assessment of hydrologic parameter estimation, *Water Resour. Res.*, 39, 2003.

Vrugt, J. A. and Bouten, W.: Validity of First-Order Approximations to Describe Parameter Uncertainty in Soil Hydrologic Models, *Soil Science Society of America Journal*, 66(6), 1740, doi:10.2136/sssaj2002.1740, 2002.

Vrugt, J. A., ter Braak, C. J. F., Clark, M. P., Hyman, J. M. and Robinson, B. A.: Treatment of input uncertainty in hydrologic modeling: Doing hydrology backward with Markov chain Monte Carlo simulation: FORCING DATA ERROR USING MCMC SAMPLING, *Water Resources Research*, 44(12), doi:10.1029/2007WR006720, 2008.

Vrugt, J.A., ter Braak, C.J.F., Diks, C.G.H., Robinson, B.A., Hyman, J.M. and Higdon, D.: Accelerating Markov chain Monte Carlo simulation by differential evolution with self-adaptive randomized subspace sampling. *Int. J. Nonlinear Sci. Numer. Simul.* 10:273–290. doi:10.1515/IJNSNS.2009.10.3.273. 2009a.

Vrugt, J. A.: Markov chain Monte Carlo simulation using the DREAM software package: Theory, concepts, and MATLAB implementation, *Environmental Modelling & Software*, 75, 273–316, doi: 10.1016/j.envsoft.2015.08.013, 2016.

Vrugt, J.A., Robinson, B.A., Hyman, J.M.: Self-adaptive multimethod search for global optimization in real parameter spaces. *IEEE Trans. Evol. Comput.* 13:243–259.

[doi:10.1109/TEVC.2008.924428](https://doi.org/10.1109/TEVC.2008.924428), 2009b.

Vugrin, K. W., Swiler, L. P., Roberts, R. M. , Stucky-Mack, N. J., and Sullivan, S. P.: Confidence region estimation techniques for nonlinear regression in groundwater flow: Three case studies, *Water Resour. Res.*, 43, W03423, doi:10.1029/2005WR004804, 2007.

Wiener, N.: The Homogeneous Chaos, *American Journal of Mathematics*, 60(4), 897, doi:10.2307/2371268, 1938.

Younes, A., Fahs, M. and Ahmed, S.: Solving density driven flow problems with efficient spatial discretizations and higher-order time integration methods, *Advances in Water Resources*, 32(3), 340–352, doi:10.1016/j.advwatres.2008.11.003, 2009.

Younes, A., Fahs, M., Belfort, B.: Monotonicity of the cell-centred triangular MPFA method for saturated and unsaturated flow in heterogeneous porous media, *Journal of Hydrology*, 504, 132-141, doi:10.1016/j.jhydrol.2013.09.041, 2013.

Younes, A., Mara, T. A., Fajraoui, N., Lehmann, F., Belfort, B. and Beydoun, H.: Use of Global Sensitivity Analysis to Help Assess Unsaturated Soil Hydraulic Parameters, *Vadose Zone Journal*, 12(1), 0, doi:10.2136/vzj2011.0150, 2013.

Younes, A., Delay, F., Fajraoui, N., Fahs, M. and Mara, T. A.: Global sensitivity analysis and Bayesian parameter inference for solute transport in porous media colonized by biofilms, *Journal of Contaminant Hydrology*, 191, 1–18, doi:10.1016/j.jconhyd.2016.04.007, 2016.

Younes, A., Mara, T., Fahs, M., Grunberger, O. and Ackerer, P.: Hydraulic and transport parameter assessment using column infiltration experiments, *Hydrology and Earth System Sciences*, 21(5), 2263–2275, doi:10.5194/hess-21-2263-2017, 2017.

Zablocki, C.J.: Streaming potentials resulting from the descent of meteoric water: A possible source mechanism for Kilauean self-potential anomalies. *Trans. Geotherm. Resour. Council*. 2:747–748, 1978.

540 **List of table captions**

541 Table 1. Reference values, lower and upper bounds for hydraulic and geophysical parameters.

542 Table 2. The first-order sensitivity index  $S_i$  and the total sensitivity index  $ST_i$  for the SP  
543 signal at 5 cm and 77 cm below the soil surface at different times.

544 Table 3: Estimated mean values (underlined), confidence intervals (CIs) and size of the  
545 posterior CIs (*italic*) with MCMC and FOA approaches for scenario 1.

546 Table 4: Estimated mean values (underlined), confidence intervals (CIs) and size of the  
547 posterior CIs (*italic*) with MCMC and FOA approaches for scenario 2.



| Parameters                                      | Lower bounds | Upper bounds | Reference values |
|-------------------------------------------------|--------------|--------------|------------------|
| $K_s$ [cm min <sup>-1</sup> ]                   | 0.1          | 2            | 0.495            |
| $\theta_r$ [cm <sup>3</sup> min <sup>-3</sup> ] | 0            | 0.2          | 0.045            |
| $\alpha$ [cm <sup>-1</sup> ]                    | 0.01         | 0.2          | 0.145            |
| $n$                                             | 1.5          | 7            | 2.68             |
| $n_a$ [-]                                       | 1            | 3            | 1.6              |
| $C_{sat} \times (-10^{-7})$ [V/Pa]              | 2            | 4            | 2.9              |

Table 1. Reference values, lower and upper bounds for hydraulic and geophysical parameters.

|                                                  | $K_s$<br>[cm min <sup>-1</sup> ] | $\theta_r$<br>[cm <sup>3</sup> min <sup>-3</sup> ] | $\alpha$<br>[cm <sup>-1</sup> ] | $n$   | $n_a$ | $C_{sat}$<br>[V/Pa] |
|--------------------------------------------------|----------------------------------|----------------------------------------------------|---------------------------------|-------|-------|---------------------|
| <b>a- sensor 1 (5 cm from the soil surface)</b>  |                                  |                                                    |                                 |       |       |                     |
| t=10 min (total variance = 0.72)                 |                                  |                                                    |                                 |       |       |                     |
| $S_i$                                            | 0.055                            | 0                                                  | 0                               | 0     | 0     | 0.942               |
| $ST_i$                                           | 0.057                            | 0                                                  | 0                               | 0     | 0     | 0.945               |
| t=70 min (total variance = 2.17)                 |                                  |                                                    |                                 |       |       |                     |
| $S_i$                                            | 0.841                            | 0.217                                              | 0.005                           | 0.014 | 0.008 | 0.045               |
| $ST_i$                                           | 0.894                            | 0.043                                              | 0.008                           | 0.028 | 0.021 | 0.078               |
| t=800 min (total variance = 0.224)               |                                  |                                                    |                                 |       |       |                     |
| $S_i$                                            | 0.053                            | 0.266                                              | 0.015                           | 0.038 | 0.094 | 0.008               |
| $ST_i$                                           | 0.085                            | 0.738                                              | 0.065                           | 0.266 | 0.472 | 0.041               |
| <b>b- sensor 4 (77 cm from the soil surface)</b> |                                  |                                                    |                                 |       |       |                     |
| t=10 min (total variance = 0.094)                |                                  |                                                    |                                 |       |       |                     |
| $S_i$                                            | 0.055                            | 0                                                  | 0                               | 0     | 0     | 0.942               |
| $ST_i$                                           | 0.057                            | 0                                                  | 0                               | 0     | 0     | 0.945               |
| t=70 min (total variance = 0.2744)               |                                  |                                                    |                                 |       |       |                     |
| $S_i$                                            | 0.839                            | 0.015                                              | 0.014                           | 0.013 | 0.005 | 0.053               |
| $ST_i$                                           | 0.891                            | 0.028                                              | 0.024                           | 0.025 | 0.011 | 0.086               |
| t=800 min (total variance = 0.224)               |                                  |                                                    |                                 |       |       |                     |
| $S_i$                                            | 0.099                            | 0.225                                              | 0.054                           | 0.043 | 0.085 | 0.01                |
| $ST_i$                                           | 0.138                            | 0.621                                              | 0.218                           | 0.238 | 0.379 | 0.043               |

Table 2. The first-order sensitivity index  $S_i$  and the total sensitivity index  $ST_i$  for the SP signal at 5 cm and 77 cm below the soil surface at different times.

|                                                    | <b>MCMC</b>                                         | <b>FOA</b>                                          |
|----------------------------------------------------|-----------------------------------------------------|-----------------------------------------------------|
| $K_s$<br>[cm min <sup>-1</sup> ]                   | <u><b>0.49</b></u><br>(0.487-0.498)<br><i>0.01</i>  | <u><b>0.49</b></u><br>(0.487-0.497)<br><i>0.01</i>  |
| $\theta_s$<br>[cm <sup>3</sup> min <sup>-3</sup> ] | <u><b>0.43</b></u><br>(0.41-0.45)<br><i>0.04</i>    | <u><b>0.43</b></u><br>(0.41-0.45)<br><i>0.04</i>    |
| $\theta_r$<br>[cm <sup>3</sup> min <sup>-3</sup> ] | <u><b>0.046</b></u><br>(0.025-0.068)<br><i>0.04</i> | <u><b>0.046</b></u><br>(0.026-0.066)<br><i>0.04</i> |
| $\alpha$<br>[cm <sup>-1</sup> ]                    | <u><b>0.14</b></u><br>(0.12-0.17)<br><i>0.05</i>    | <u><b>0.14</b></u><br>(0.12-0.16)<br><i>0.04</i>    |
| $n$                                                | <u><b>2.64</b></u><br>(2.54-2.77)<br><i>0.23</i>    | <u><b>2.64</b></u><br>(2.54-2.76)<br><i>0.22</i>    |
| $n_a$                                              | <u><b>1.64</b></u><br>(1.37-1.98)<br><i>0.6</i>     | <u><b>1.64</b></u><br>(1.38-1.90)<br><i>0.5</i>     |
| $C_{sat}$<br>[V/Pa]                                | <u><b>2.90</b></u><br>(2.89-2.91)<br><i>0.02</i>    | <u><b>2.90</b></u><br>(2.89-2.91)<br><i>0.02</i>    |

Table 3: Estimated mean values (underlined), confidence intervals (CIs) and size of the posterior CIs (italic) with MCMC and FOA approaches for scenario 1.

|                                                    | <b>MCMC</b>                                         | <b>FOA</b>                                          |
|----------------------------------------------------|-----------------------------------------------------|-----------------------------------------------------|
| $K_s$<br>[cm min <sup>-1</sup> ]                   | <b><u>0.49</u></b><br>(0.481-0.495)<br><i>0.014</i> | <b><u>0.49</u></b><br>(0.474-0.503)<br><i>0.029</i> |
| $\theta_s$<br>[cm <sup>3</sup> min <sup>-3</sup> ] | <b><u>0.43</u></b><br>(0.41-0.45)<br><i>0.04</i>    | <b><u>0.43</u></b><br>(0.41-0.45)<br><i>0.04</i>    |
| $\theta_r$<br>[cm <sup>3</sup> min <sup>-3</sup> ] | <b><u>0.053</u></b><br>(0.011-0.093)<br><i>0.08</i> | <b><u>0.053</u></b><br>(0.002-0.103)<br><i>0.1</i>  |
| $\alpha$<br>[cm <sup>-1</sup> ]                    | <b><u>0.13</u></b><br>(0.07-0.20)<br><i>0.13</i>    | <b><u>0.13</u></b><br>(-0.15-0.43)<br><i>0.58</i>   |
| $n$                                                | <b><u>2.54</u></b><br>(2.44-2.68)<br><i>0.24</i>    | <b><u>2.56</u></b><br>(2.44-2.68)<br><i>0.24</i>    |
| $n_a$                                              | <b><u>1.82</u></b><br>(1.36-2.41)<br><i>1.05</i>    | <b><u>1.78</u></b><br>(1.29-2.27)<br><i>0.98</i>    |
| $C_{sat}$<br>[V/Pa]                                | <b><u>2.89</u></b><br>(2.88-2.91)<br><i>0.03</i>    | <b><u>2.89</u></b><br>(2.88-2.91)<br><i>0.03</i>    |

Table 4: Estimated mean values (underlined), confidence intervals (CIs) and size of the posterior CIs (italic) with MCMC and FOA approaches for scenario 2.

552

### List of figure captions

553 Figure 1. Illustration of the experimental device.

554

555 Figure2. Reference SP signals. Solid lines represent the reference SP solution and dots  
556 represent the sets of perturbed data serving as conditioning information for model calibration.

557

558 Figure 3. Time distribution of the SP variance at 5cm (a) and 77cm (b) depth. The shaded area  
559 under the variance curve represents the partial marginal contributions of the random input  
560 parameters; the contribution of interactions between parameters is represented by the blank  
561 region between the shaded area and the variance curve.

562

563 Figure 4. MCMC solutions when all SP data are considered for the calibration. The diagonal  
564 plots represent the inferred posterior probability distribution of the model parameters. The  
565 off-diagonal scatterplots represent the pairwise correlations in the MCMC drawing.

566

567 Figure 5. MCMC solutions when calibration is performed using only SP data located at 5 cm  
568 from the surface. The diagonal plots represent the posterior probability distribution of the  
569 parameters. The off-diagonal scatterplots represent the pairwise correlations in the MCMC  
570 drawing.

571

572

573

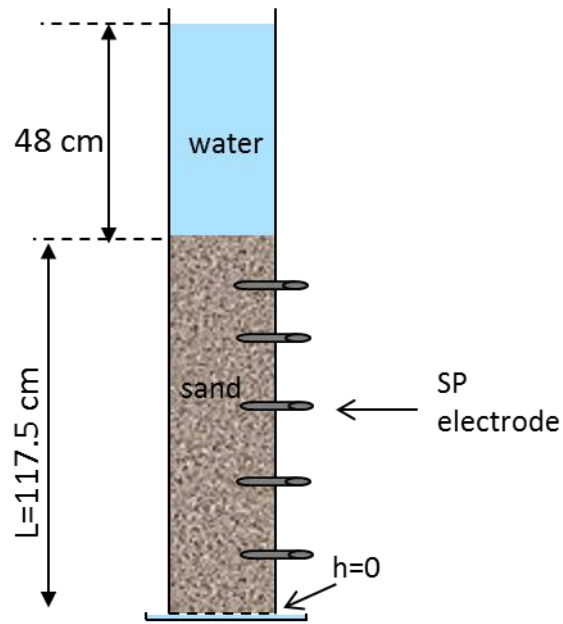

574

575

576

577

578

579

580

Figure 1. Illustration of the experimental device.

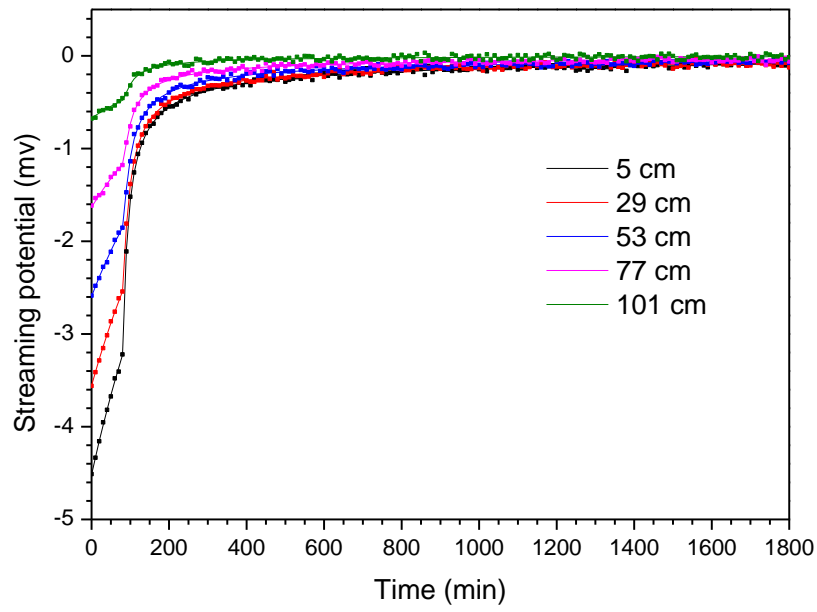

Figure 2. Reference SP signals. Solid lines represent the reference SP solution and dots represent the sets of perturbed data serving as conditioning information for model calibration.

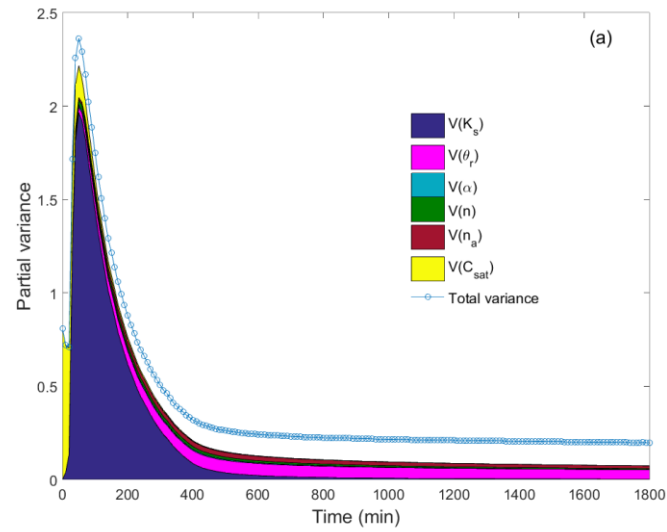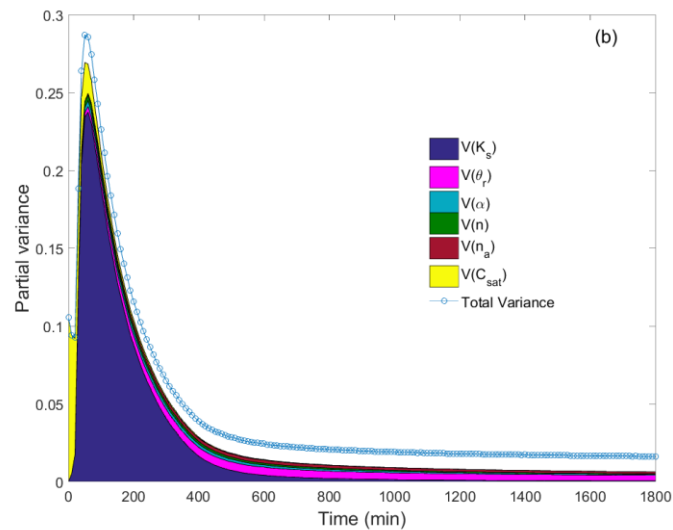

Figure 3. Time distribution of the SP variance at 5cm (a) and 77cm (b) depth. The shaded area under the variance curve represents the partial marginal contributions of the random input parameters; the contribution of interactions between parameters is represented by the blank region between the shaded area and the variance curve.



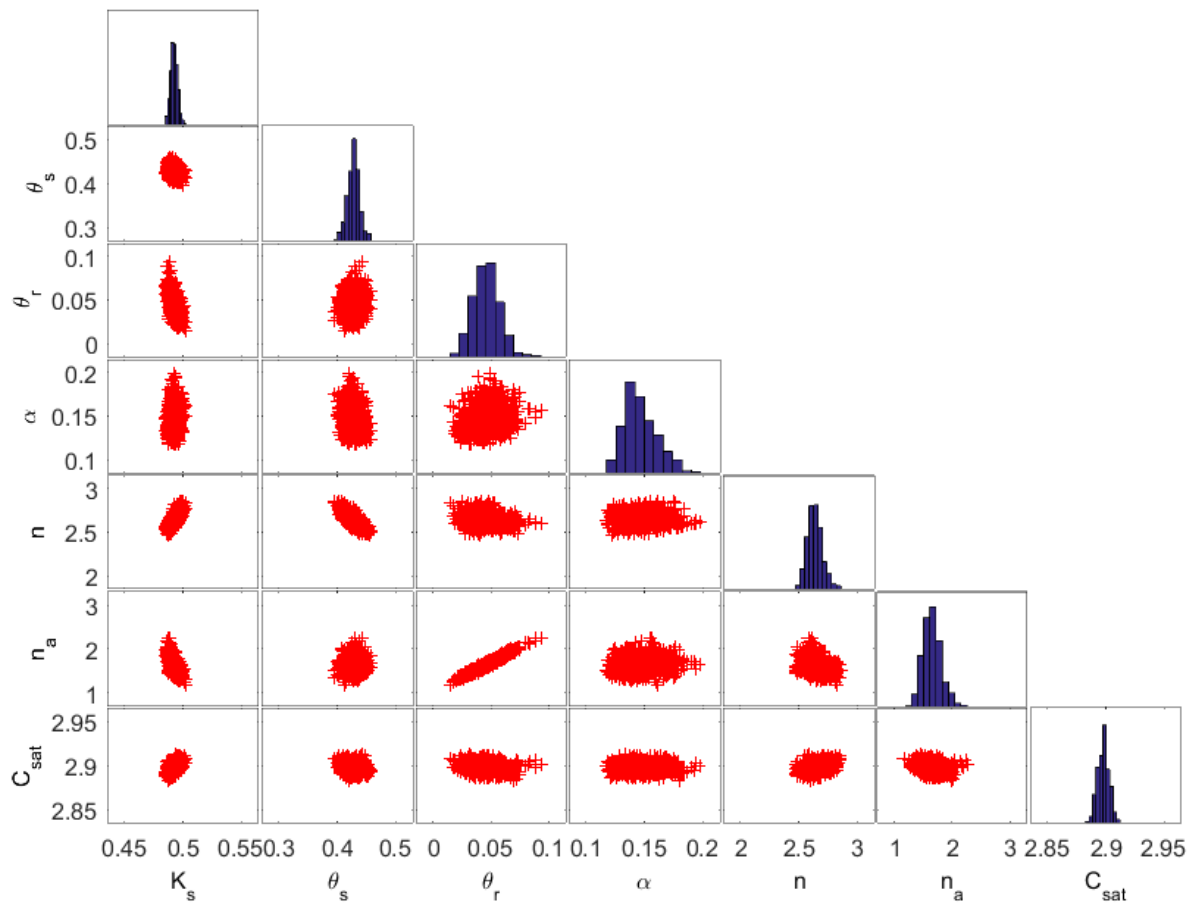

Figure 4. MCMC solutions when all SP data are considered for the calibration. The diagonal plots represent the inferred posterior probability distribution of the model parameters. The off-diagonal scatterplots represent the pairwise correlations in the MCMC drawing.

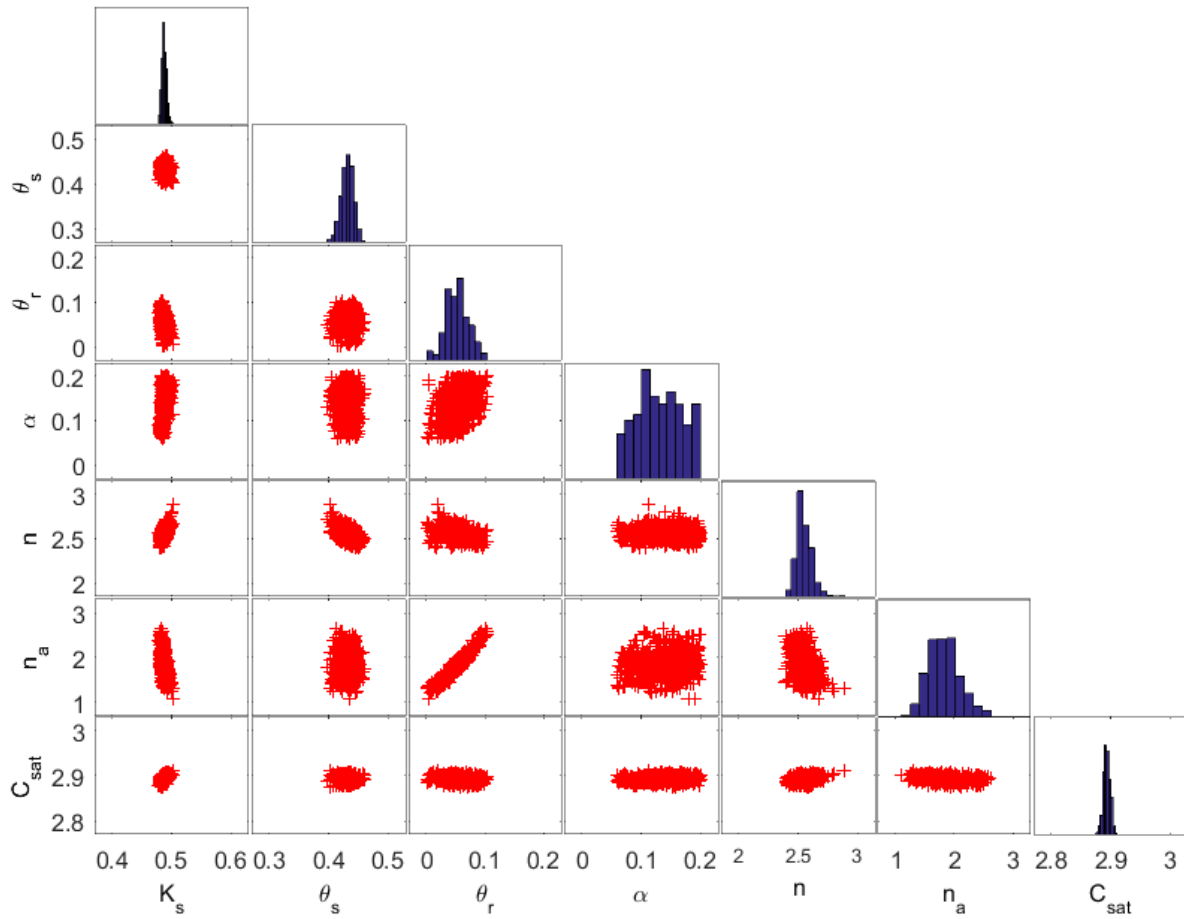

Figure 5. MCMC solutions when calibration is performed using only SP data located at 5 cm from the surface. The diagonal plots represent the posterior probability distribution of the parameters. The off-diagonal scatterplots represent the pairwise correlations in the MCMC drawing.
